# Supplementary material for: Bacterial Microbiota and Soil Fertility of Crocus sativus L. Rhizosphere in the Presence and Absence of Fusarium spp.
Source: MDPI journal article supplement (doi:10.3390/land11112048), 2022-11-15
Supplement: s1 [file s1]

## *Supplementary material*

*Article*

# **Bacterial Microbiota and Soil Fertility of *Crocus sativus* L. rhizosphere in the presence and absence of *Fusarium* spp.**

Beatrice Farda <sup>1</sup>, Rihab Djebaili <sup>1</sup>, Matteo Bernardi <sup>1</sup>, Loretta Pace <sup>1</sup>, Maddalena Del Gallo <sup>1</sup> and Marika Pellegrini <sup>1,\*</sup>

<sup>1</sup> Department of Life, Health and Environmental Sciences, University of L'Aquila, Via Vetoio, Coppito, 67100 L'Aquila, Italy

\* Correspondence: marika.pellegrini@univaq.it; Tel.: +39-0862-433258

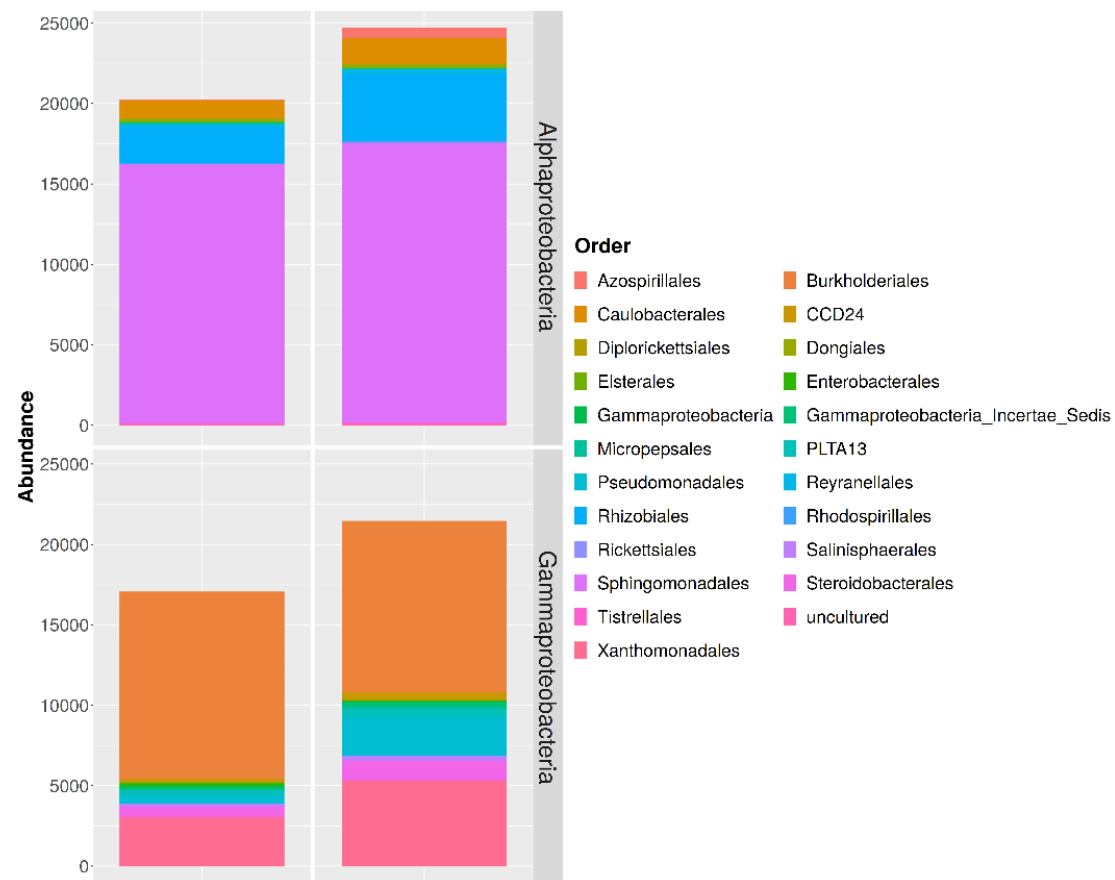

**Figure S1.** Stacked barplot that shows the comparison of the abundances of Amplicon Sequence Variants (ASVs) associated with Pseudomonadota (syn. Proteobacteria) phylum of the group with *Fusarium* pathogenesis (on the left) and without (on the right). In the barplot the main classes and orders of the phylum are showed

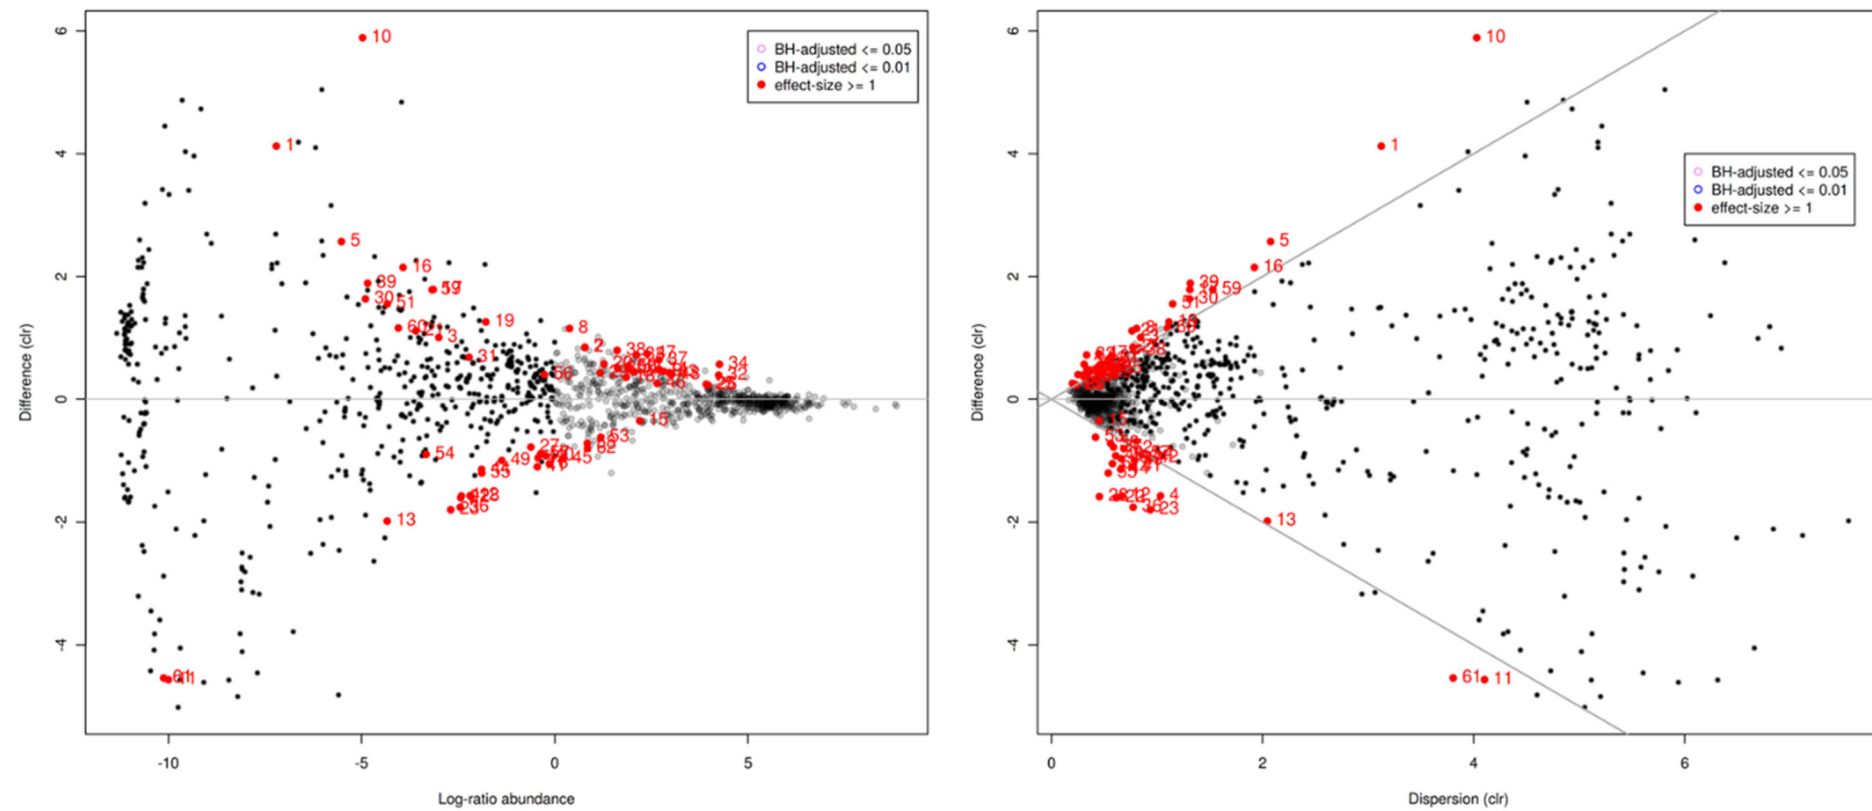

**Figure S2.** Comparisons of the enzymes (ECs) predicted in the presence (lower part) and absence (upper part) of fusariosis. The panel on the left displays the Bland-Altman plot that shows the relationship between Abundance and Difference of the ECs. The panel on the right displays the Effect plot that shows the relationship between Difference and Dispersion of the ECs. In both plots not significant features are shown in grey and black. Features that are statistically significant are in red.

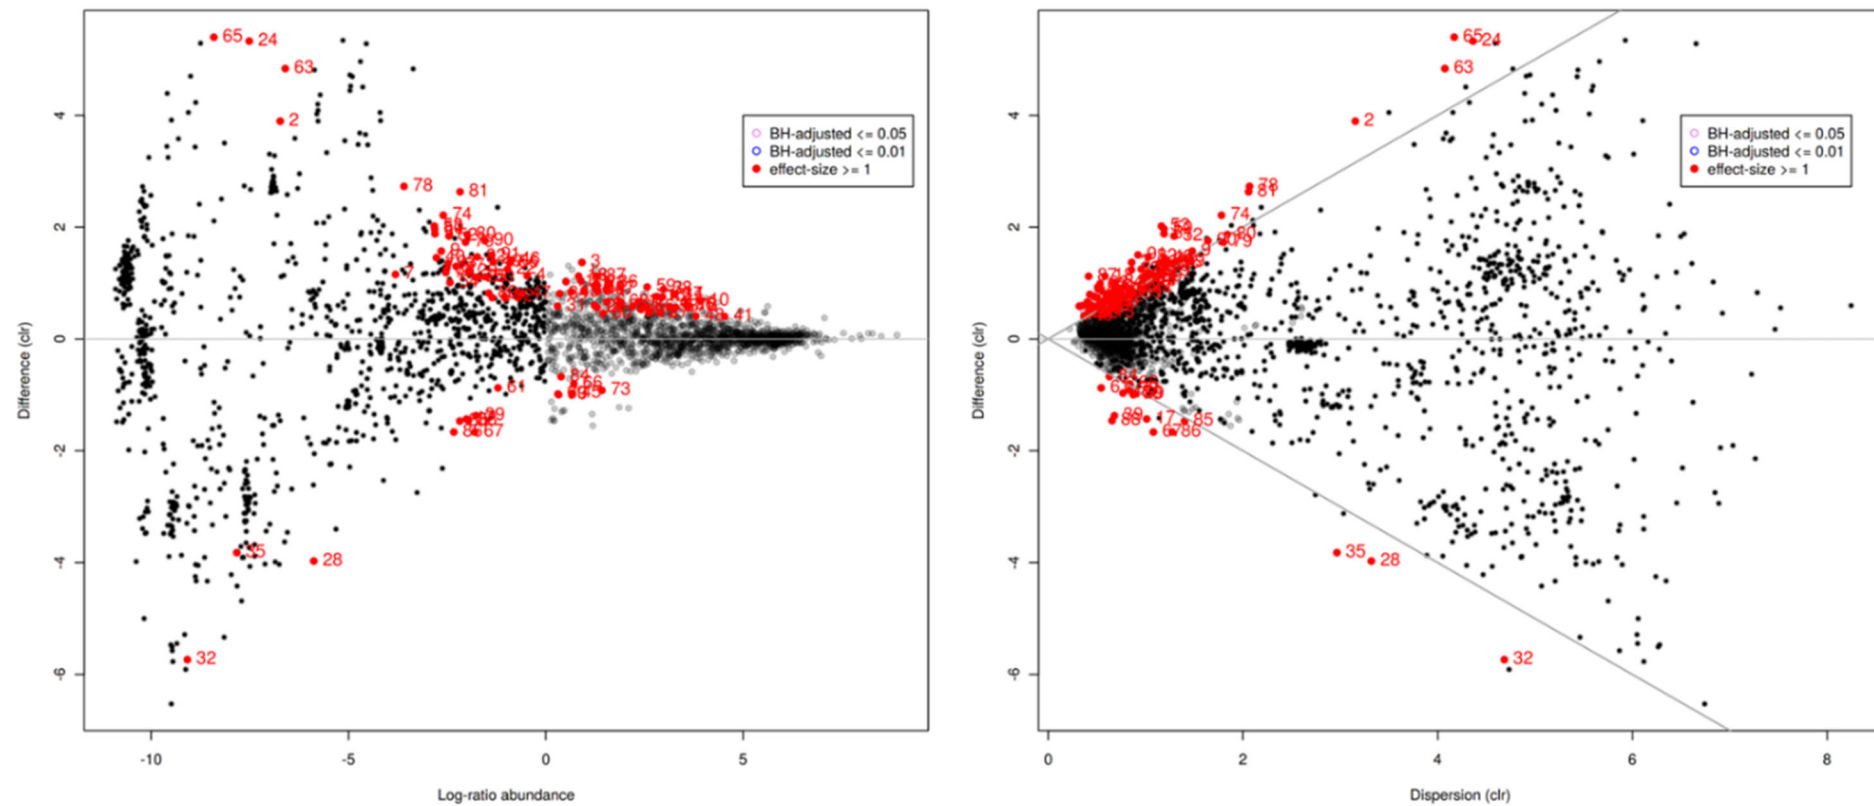

**Figure S3.** Comparisons of the gene copies (KOs) predicted in the presence (lower part) and absence (upper part) of fusariosis. The panel on the left displays the Bland-Altman plot that shows the relationship between Abundance and Difference of the KOs. The panel on the right displays the Effect plot that shows the relationship between Difference and Dispersion of the KOs. In both plots not significant features are shown in grey and black. Features that are statistically significant are in red.

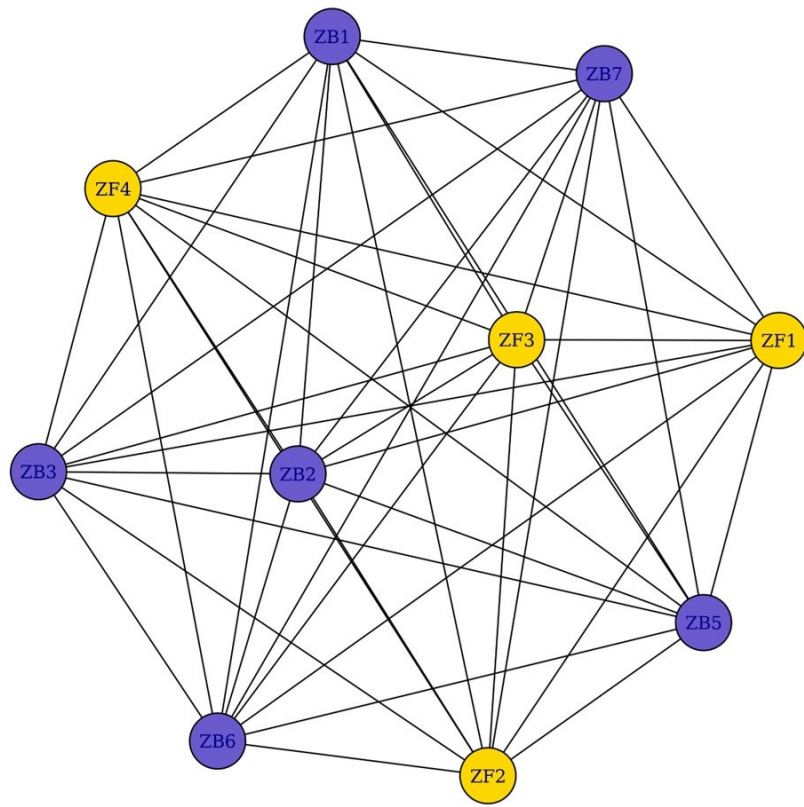

**Figure S4.** Co-occurrence network analysis at sample carried out on the complete dataset of saffron rhizospheres with the absence and presence of fusariosis. Maximum Jaccard similarity coefficient.
